# Supplementary material for: Understanding crystallization pathways leading to manganese oxide polymorph formation
Source: PubMed Central journal article supplement (PMC6026189; doi:10.1038/s41467-018-04917-y), 2018-06-29
Supplement: 41467_2018_4917_MOESM3_ESM.pdf [file 41467_2018_4917_MOESM3_ESM.pdf]

## **Description of Additional Supplementary Files**

**File Name: Supplementary Data 1**

**Description:** Structure file of the refined alpha phase.

**File Name: Supplementary Data 2**

**Description:** Structure file of the refined beta phase.

**File Name: Supplementary Data 3**

**Description:** Structure file of the refined delta phase.

**File Name: Supplementary Data 4**

**Description:** Structure file of the idealized gamma phase.

**File Name: Supplementary Data 5**

**Description:** Structure file of the idealized R phase.
